# Supplementary material
Source: Springer Nature journal article supplement (https://www.springermedizin.de/resource/supplementary/12889_2014_6865_MOESM2_ESM.pdf/9498964)
Supplement: MOESM2 [file 9498964]

|                                               | STUDY PERIOD |                                                                                   |                 |           |           |
|-----------------------------------------------|--------------|-----------------------------------------------------------------------------------|-----------------|-----------|-----------|
|                                               | Enrollment   | Baseline Visit                                                                    | Post-allocation |           | Close-out |
| TIMEPOINT                                     | $-t_1$       | 0                                                                                 | 3 months        | 12 months | 24 months |
| <b>ENROLMENT:</b>                             |              |                                                                                   |                 |           |           |
| Eligibility screen                            | X            | X                                                                                 |                 |           |           |
| Informed consent                              |              | X                                                                                 |                 |           |           |
| <i>[List other procedures]</i>                |              |                                                                                   |                 |           |           |
| Allocation                                    |              | X                                                                                 |                 |           |           |
| <b>INTERVENTIONS:</b>                         |              |                                                                                   |                 |           |           |
| <i>Brief Intervention</i>                     |              | X                                                                                 |                 |           |           |
| <i>12 weeks Commercial Programme</i>          |              |  |                 |           |           |
| <i>52 weeks Commercial Programme</i>          |              |  |                 |           |           |
| <b>ASSESSMENTS:</b>                           |              |                                                                                   |                 |           |           |
| <i>Height</i>                                 |              | X                                                                                 |                 |           |           |
| <i>Weight</i>                                 |              | X                                                                                 | X               | X         | X         |
| <i>Fat mass</i>                               |              | X                                                                                 | X               | X         | X         |
| <i>Waist Circumference</i>                    |              | X                                                                                 | X               | X         | X         |
| <i>Blood Pressure</i>                         |              | X                                                                                 | X               | X         | X         |
| <i>Blood Glucose</i>                          |              | X                                                                                 |                 | X         |           |
| <i>Lipid Profile</i>                          |              | X                                                                                 |                 | X         |           |
| <i>HbA1c</i>                                  |              | X                                                                                 |                 | X         |           |
| <i>DNA</i>                                    |              | X                                                                                 |                 |           |           |
| <i>Demographics Questionnaire</i>             |              | X                                                                                 | X               | X         | X         |
| <i>Health Care Usage Questionnaire</i>        |              | X                                                                                 | X               | X         | X         |
| <i>EQ5D</i>                                   |              | X                                                                                 | X               | X         | X         |
| <i>Psychosocial Questionnaires</i>            |              | X                                                                                 | X               | X         | X         |
| <i>Intervention Usage Questionnaires</i>      |              | X                                                                                 | X               | X         | X         |
| <i>Structured Diary Entries (subset only)</i> |              | X                                                                                 | X               |           |           |
| <i>Qualitative Interviews (subset only)</i>   |              |                                                                                   | X               |           |           |
